# Supplementary material for: Stripping #The Dress: the importance of contextual information on inter-individual differences in colour perception
Source: Springer Nature journal article supplement (doi:10.1007/s00426-018-1097-1), 2018-09-26
Supplement: MOESM1 [file 16155594]

**Supplementary material**

| Patch number | Size in cm | Patch colour | Average *RGB* value | | |  | Average *CIELCh* value | | |
| --- | --- | --- | --- | --- | --- | --- | --- | --- | --- |
|  |  |  | *R* | *G* | *B* |  | *L* | *C* | *H* |
| 1. | 1.1 x 1.7 | Dark | 66 | 55 | 32 |  | 23.54 | 14.09 | 71.80 |
| 2. | 1.3 x 1.7 | Light | 94 | 104 | 136 |  | 44.92 | 21.93 | 280.37 |
| 3. | 0.7 x 1.4 | Dark | 59 | 49 | 39 |  | 20.56 | 8.48 | 51.24 |
| 4. | 0.8 x 1.7 | Light | 90 | 102 | 150 |  | 44.70 | 30.63 | 283.13 |
| 5. | 0.8 x 1.7 | Dark | 62 | 54 | 47 |  | 23.22 | 4.87 | 35.32 |
| 6. | 0.8 x 1.3 | Dark | 101 | 87 | 52 |  | 38.80 | 19.57 | 278.62 |
| 7. | 1.1 x 1.1 | Light | 132 | 142 | 174 |  | 60.23 | 19.57 | 278.62 |
| 8. | 0.7 x 1.3 | Dark | 75 | 63 | 50 |  | 27.57 | 8.86 | 50.04 |
| 9. | 0.7 x 1.3 | Light | 85 | 92 | 129 |  | 40.51 | 24.96 | 285.11 |
| 10. | 0.7 x 1.3 | Dark | 55 | 45 | 63 |  | 19.42 | 17.11 | 306.59 |

**Table S1. Sizes and colour parameters of the original patches (before stretching).**

**Figure S1. The picture of the ambiguous Dress picture.** We indicate the exact locations from which the patches and strips were cut out for the different presentations (Study Two). These locations should be used in reference with Figure 1 detailing the order of the experiment.

**Figure S2.** Participant colour selections for light and dark parts of the three context conditions (patch, strip, and the ambiguous Dress image) displayed on CIE Lab space.

**Figure S3.** **Hue distribution of the matched Dress colours.** Colours were matched from the dark and the light parts of the Dress displayed by context (patch, stripe, Dress). R = red (346°-40], O = orange (40°-72°], Y = yellow (72°-105°], Y-G = yellow-green (105°-130°], G = green (130°-166°], B = blue (220°-275°], P = purple (275°-346°], and A = achromatic (chroma less than 5, any hue angle). Hue category green-blue (166°-220°] is missing from this graph because no one matched a colour from this hue range.
